# Supplementary material
Source: Springer Nature journal article supplement (https://www.springermedizin.de/resource/supplementary/12891_2013_2281_MOESM1_ESM.pdf/9509880)

**a** Normal

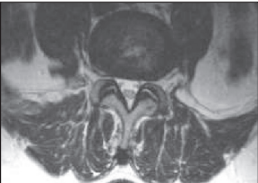

**b** Moderate

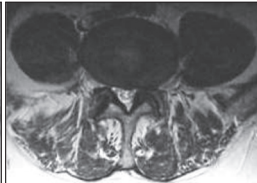

**c** Severe

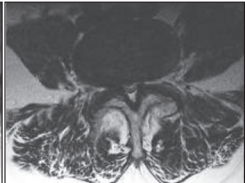

Supplement: MOESM1 [file 9509880]
